# Supplementary material for: Quantitatively Increased Somatic Transposition of Transposable Elements in Drosophila Strains Compromised for RNAi
Source: PubMed Central journal article supplement (PMC3733903; doi:10.1371/journal.pone.0072163), 2013-08-05
Supplement: pone.0072163.s001.pdf [file pone.0072163.s001.pdf]

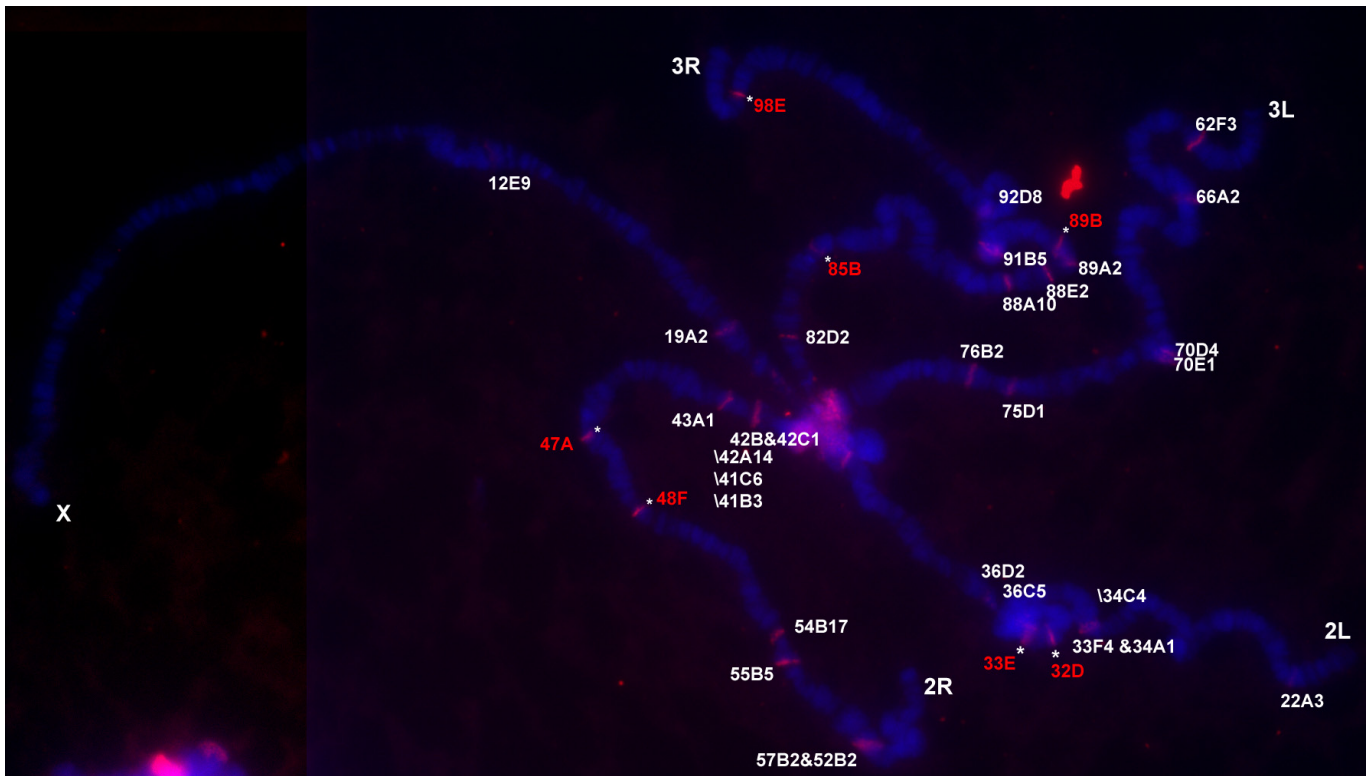

**Figure S1.** Distribution of F element on 2057 polytene chromosomes. The unexpected bands from the reference genome sequence were indicated with “\*”. When an expected band was not present, the name and the position of the band was still shown with the designation “\”.
