# Supplementary material for: Quantitatively Increased Somatic Transposition of Transposable Elements in Drosophila Strains Compromised for RNAi
Source: PubMed Central journal article supplement (PMC3733903; doi:10.1371/journal.pone.0072163), 2013-08-05
Supplement: pone.0072163.s002.pdf [file pone.0072163.s002.pdf]

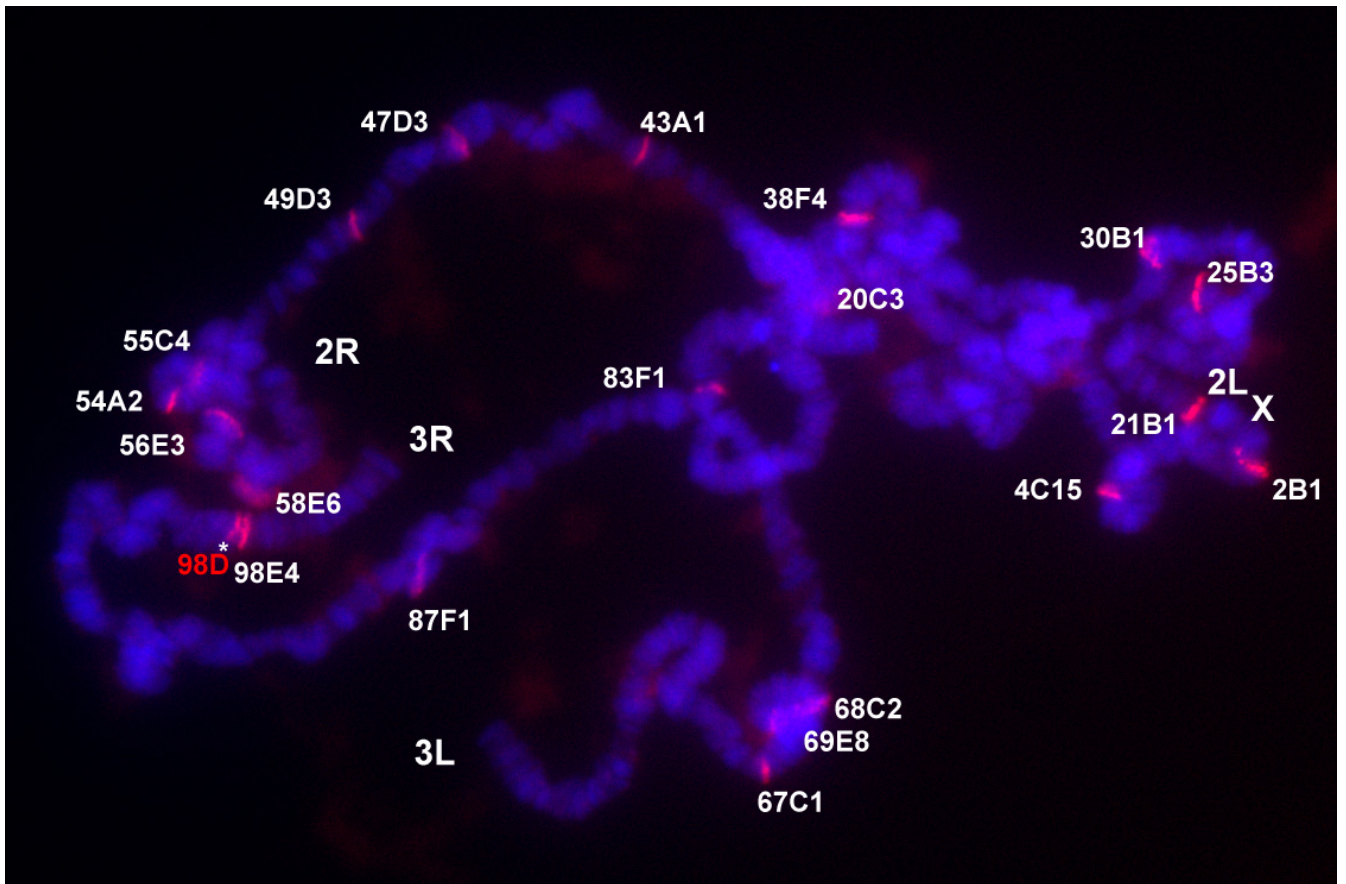

**Figure S2.** Distribution of Jockey on 2057 polytene chromosomes. The unexpected bands from the reference genome sequence were indicated with “\*”.
