# Supplementary material for: Quantitatively Increased Somatic Transposition of Transposable Elements in Drosophila Strains Compromised for RNAi
Source: PubMed Central journal article supplement (PMC3733903; doi:10.1371/journal.pone.0072163), 2013-08-05
Supplement: pone.0072163.s003.pdf [file pone.0072163.s003.pdf]

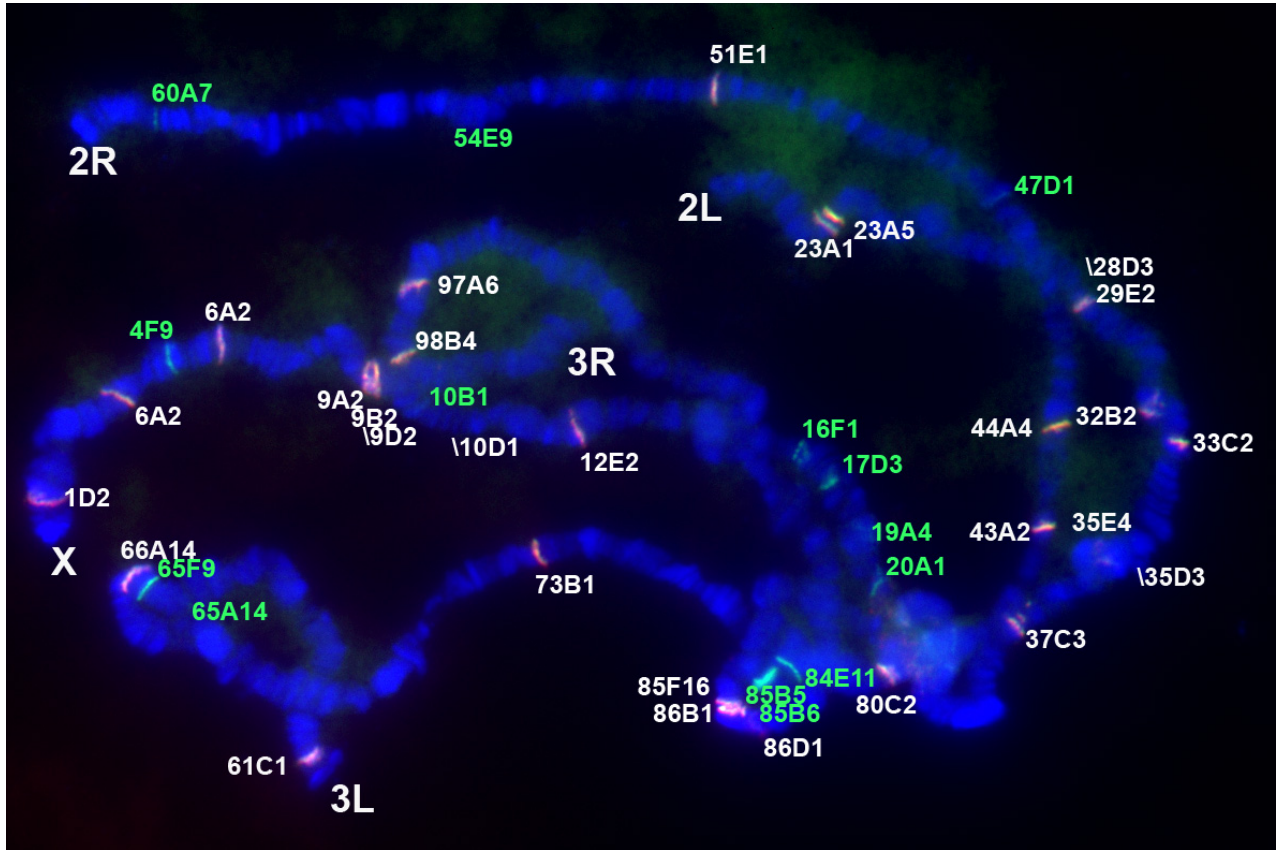

**Figure S3.** Detecting LTR and full-length bands of 297 on 2057 polytene chromosomes. LTR probe was labeled green and full-length probe is red. The bands detected by the LTR probe but not by the full-length probe are numbered in green font. When an expected band was not present, the name and the position of the band is designated “\”.
