# Supplementary material for: Quantitatively Increased Somatic Transposition of Transposable Elements in Drosophila Strains Compromised for RNAi
Source: PubMed Central journal article supplement (PMC3733903; doi:10.1371/journal.pone.0072163), 2013-08-05
Supplement: pone.0072163.s004.pdf [file pone.0072163.s004.pdf]

**Table S1.** Somatic transposition summary with *dcr2* mutant and control in 2057 background.

|                      | Larvae | Total cell # | 297  | DOC  |
|----------------------|--------|--------------|------|------|
| <b>Wild Type</b>     |        |              |      |      |
|                      | I3     | 35           | 0    | 0    |
|                      | I4     | 42           | 1    | 0    |
|                      | I6     | 22           | 0    | 0    |
|                      | I1'    | 7            | 0    | 0    |
|                      | I3'    | 2            | 0    | 0    |
|                      | I6'    | 7            | 0    | 0    |
|                      | Sum    | 115          | 1    | 0    |
|                      | Rate*  |              | 0.9  | 0.0  |
| <b>dcr2[GE]/+</b>    |        |              |      |      |
|                      | I1     | 17           | 0    | 0    |
|                      | I10    | 12           | 0    | 0    |
|                      | I15    | 21           | 0    | 0    |
|                      | I13'   | 9            | 0    | 0    |
|                      | Sum    | 59           | 0    | 0    |
|                      | Rate*  |              | 0.0  | 0.0  |
| <b>dcr2[CY]/+</b>    |        |              |      |      |
|                      | I2     | 19           | 0    | 1    |
|                      | I5     | 24           | 1    | 2    |
|                      | I6     | 35           | 0    | 3    |
|                      | I7     | 32           | 0    | 1    |
|                      | Sum    | 110          | 1    | 7    |
|                      | Rate*  |              | 0.9  | 6.4  |
| <b>dcr2[GE]/[CY]</b> |        |              |      |      |
|                      | I1     | 48           | 12   | 3    |
|                      | I3     | 17           | 4    | 1    |
|                      | I6     | 22           | 1    | 4    |
|                      | I1'    | 10           | 2    | 2    |
|                      | I2'    | 24           | 7    | 3    |
|                      | Sum    | 121          | 26   | 13   |
|                      | Rate*  |              | 21.5 | 10.7 |

\*Number of transpositions per 100 cells
