# Supplementary material for: Quantitatively Increased Somatic Transposition of Transposable Elements in Drosophila Strains Compromised for RNAi
Source: PubMed Central journal article supplement (PMC3733903; doi:10.1371/journal.pone.0072163), 2013-08-05
Supplement: pone.0072163.s005.pdf [file pone.0072163.s005.pdf]

**Table S2.** Somatic transposition summary with *dcr2* mutant and control in Canton S background.

|                      | Larvae | Total cell # | 297 | DOC |
|----------------------|--------|--------------|-----|-----|
| <b>Wild Type</b>     |        |              |     |     |
|                      | l1     | 42           | 0   | 0   |
|                      | l2     | 54           | 0   | 1   |
|                      | l3     | 32           | 0   | 0   |
|                      | l5     | 55           | 0   | 0   |
|                      | l6     | 48           | 0   | 0   |
|                      | Sum    | 231          | 0   | 1   |
|                      | Rate*  |              | 0.0 | 0.4 |
| <b>dcr2[GE]/+</b>    |        |              |     |     |
|                      | l2     | 59           | 0   | 0   |
|                      | l3     | 26           | 0   | 0   |
|                      | l6     | 62           | 0   | 0   |
|                      | l5'    | 30           | 0   | 0   |
|                      | l6'    | 58           | 0   | 0   |
|                      | Sum    | 235          | 0   | 0   |
|                      | Rate*  |              | 0.0 | 0.0 |
| <b>dcr2[CY]/+</b>    |        |              |     |     |
|                      | l2     | 9            | 0   | 0   |
|                      | l3     | 55           | 1   | 0   |
|                      | l4     | 24           | 0   | 1   |
|                      | l6     | 28           | 0   | 1   |
|                      | l1'    | 34           | 2   | 0   |
|                      | l2'    | 40           | 0   | 0   |
|                      | l5'    | 21           | 0   | 0   |
|                      | Sum    | 211          | 3   | 2   |
|                      | Rate*  |              | 1.4 | 0.9 |
| <b>dcr2[GE]/[CY]</b> |        |              |     |     |
|                      | l1     | 23           | 1   | 4   |
|                      | l2     | 130          | 7   | 4   |
|                      | l1     | 25           | 3   | 6   |
|                      | Sum    | 178          | 11  | 14  |
|                      | Rate*  |              | 6.2 | 7.9 |

\*Number of transpositions per 100 cells
