# Supplementary material for: Quantitatively Increased Somatic Transposition of Transposable Elements in Drosophila Strains Compromised for RNAi
Source: PubMed Central journal article supplement (PMC3733903; doi:10.1371/journal.pone.0072163), 2013-08-05
Supplement: pone.0072163.s006.pdf [file pone.0072163.s006.pdf]

**Table S3.** Somatic transposition summary with *ago2* mutant and control in Canton S background.

|                 | Larvae | Total cell # | 297  | DOC  |
|-----------------|--------|--------------|------|------|
| <b>ago2-T/+</b> |        |              |      |      |
|                 | l1     | 4            | 0    | 0    |
|                 | l2     | 7            | 0    | 0    |
|                 | l3     | 7            | 0    | 0    |
|                 | l4     | 10           | 0    | 0    |
|                 | l7     | 11           | 0    | 0    |
|                 | l9     | 13           | 0    | 0    |
|                 | l11    | 26           | 0    | 0    |
|                 | l14    | 16           | 0    | 0    |
|                 | l15    | 24           | 0    | 0    |
|                 | sum    | 118          | 0    | 0    |
|                 | Rate*  |              | 0.0  | 0.0  |
| <b>ago2-T</b>   |        |              |      |      |
|                 | l1     | 21           | 2    | 3    |
|                 | l2     | 21           | 5    | 1    |
|                 | l3     | 24           | 7    | 0    |
|                 | sum    | 66           | 14   | 4    |
|                 | Rate*  |              | 21.2 | 6.1  |
| <b>ago2-M/+</b> |        |              |      |      |
|                 | l1     | 16           | 1    | 0    |
|                 | l2     | 24           | 0    | 2    |
|                 | l4     | 27           | 0    | 3    |
|                 | l12    | 10           | 0    | 0    |
|                 | l3     | 21           | 0    | 2    |
|                 | l5     | 30           | 0    | 0    |
|                 | Sum    | 128          | 1    | 7    |
|                 | Rate*  |              | 0.8  | 5.5  |
| <b>ago2-M</b>   |        |              |      |      |
|                 | l1     | 47           | 10   | 6    |
|                 | l3     | 20           | 2    | 3    |
|                 | l6     | 13           | 3    | 4    |
|                 | l11    | 58           | 6    | 7    |
|                 | sum    | 138          | 21   | 20   |
|                 | Rate*  |              | 15.2 | 14.5 |

\*Number of transpositions per 100 cells
