# Supplementary material for: Quantitatively Increased Somatic Transposition of Transposable Elements in Drosophila Strains Compromised for RNAi
Source: PubMed Central journal article supplement (PMC3733903; doi:10.1371/journal.pone.0072163), 2013-08-05
Supplement: pone.0072163.s007.pdf [file pone.0072163.s007.pdf]

**Table S4.** Primers used for amplifying the TE probes.

|                 |                       |
|-----------------|-----------------------|
| 297 LTR         | GTGACGTATTTGGGTGGTCC  |
|                 | TGAGTCGAACTAATGTCCCG  |
| 297 full-length | GTCGTACCAAAGAAACCGGA  |
|                 | GGCCAAACTATGGCAAGTA   |
| DOC             | CTTTTCTTTCGTCTCACCGC  |
|                 | TTGTTTTGAGGGCTGAGCTT  |
| F-element       | CAAACCTCCAGCTCCTTTTGC |
|                 | CGTAACTGCGAAGTCGATCA  |
| jockey          | AGAGGTGGCTCTGCAGTCAT  |
|                 | ACGTCTGTCGGTGTTTTTCC  |
