# Supplementary material for: Quantitatively Increased Somatic Transposition of Transposable Elements in Drosophila Strains Compromised for RNAi
Source: PubMed Central journal article supplement (PMC3733903; doi:10.1371/journal.pone.0072163), 2013-08-05
Supplement: pone.0072163.s008.pdf [file pone.0072163.s008.pdf]

## Supporting Information (Methods S1)

**Genetic crosses to generate *dcr2/+* and *dcr2GE/dcr2CY* larvae in the 2057 background for FISH.** “♀” denotes virgin females. “GFPmw” denotes  $P\{w^{+mc}=ActGFP\}$ . “2057” denotes the strain or a corresponding chromosome.

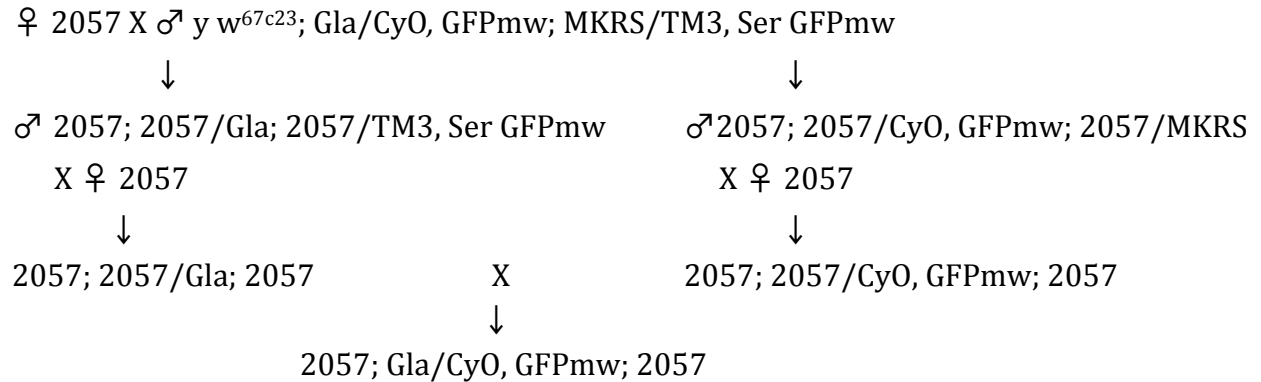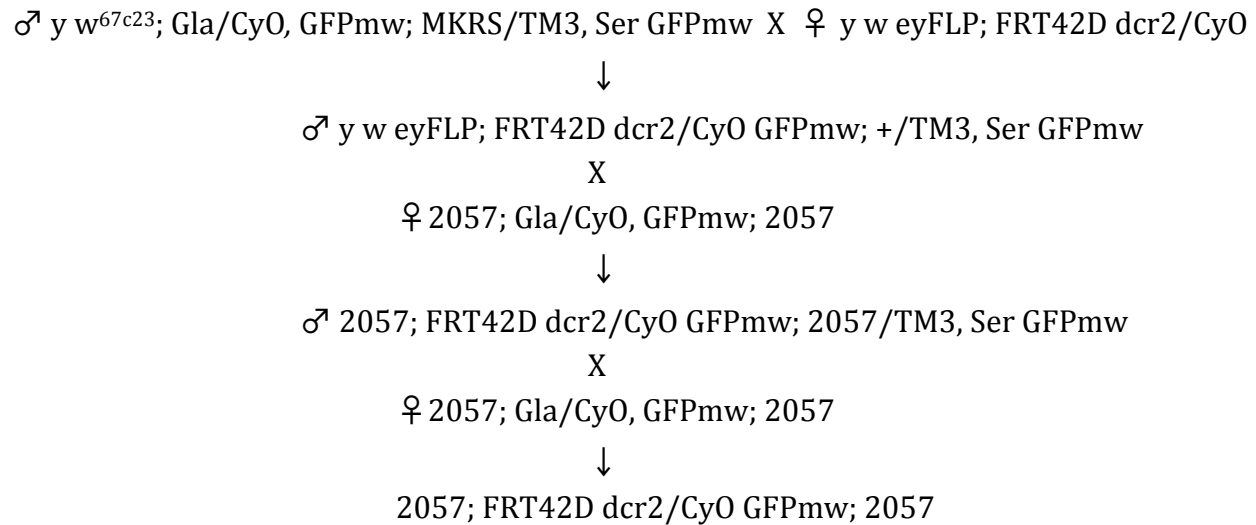

2057; FRT42D dcr2/CyO GFPmw; 2057 X 2057

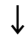

Select no GFP late 3<sup>rd</sup> instar larvae for FISH

2057; FRT42D dcr2GE/CyO GFPmw; 2057 X 2057; FRT42D dcr2CY/CyO GFPmw; 2057

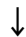

Select no GFP late 3<sup>rd</sup> instar larvae for FISH





# **Protocol for fluorescent *in situ* hybridization (FISH) on *Drosophila* salivary gland polytene chromatin**

## **Materials:**

Microscope slides (plain, 25x75x1mm, Fisher Scientific)  
Cover glass (22x22mm, Fisher)  
Cover glass (24x50mm, Corning)  
Plastic cover slips (22x22mm, Fisher)  
Dissecting dish  
200µl pipetter and tips  
Dry ice or liquid nitrogen  
Metal tray (place a few layers of wet laboratory tissue (Kimwipe) at the bottom to make a humid tray)  
Plastic tray (smaller than the metal tray)  
Plastic containers with covers (sandwich boxes or similar)

## **Tools:**

Mudont Mini Forceps M5S or Forceps Dumont #5 (Fine Science Tools)  
Sharpie Marker pen ultra fine point  
Dissecting microscope  
Olympus CX21 light microscope  
UV cross-linker  
Olympus BX61 Fluorescent Microscope equipped with camera Photometrics CoolSNAP™ HQ connected with a personal computer with picture capture software Metamorph

## **Solutions and Enzymes:**

Saline solution: 0.7% NaCl  
Fixing solution: 3ml H<sub>2</sub>O + 5ml glacial acetic acid  
Hybridization buffer: 2x SSC + 1x TE  
    20xSSC (1 litre): 175.3g NaCl, 88.2g sodium citrate in H<sub>2</sub>O, adjust pH to 7.0 with HCl (14N, a few drops)  
    10x TE: 100mM Tris-Cl (pH7.0) + 10mM EDTA pH8.0  
For nick translation:  
    Non-labeled dNTP mix (2mM)  
    DNA polymerase I (10U/µl)  
    DNase (100 mU/µl)  
    10x Nick translation buffer  
    Fluorescein-12-dUTP (green)  
    ChromaTide AlexaFluor 594-5-dUTP (red)  
Salmon sperm DNA (10mg/ml)  
Sodium acetate (3M, pH5.2) or 5M NaCl  
95% or 100% ethanol  
70% ethanol

1/20 DAPI VectaShield mounting medium (1 vol. of original DAPI medium + 19 vol. of non-DAPI medium)

## Procedures:

### I. Labeling the probes

DNA fragments used for probes (300bp to 1 kb) can be amplified and column-purified by common methods. Ideally the probe DNA concentration should be greater than 200ng/ul. In case of labeling more diluted DNA probes, one can adjust the total volume of the nick translation reaction and the volume of the 10x buffer accordingly.

**1. Nick translation:** Label 2-5µg of probes as needed. The amount can be adjusted in proportion. For labeling 2 µg probe, add:

|                             |              |
|-----------------------------|--------------|
| DNA                         | 2µg          |
| Non-labelled dNTPs (2 mM)   | 2.0ul        |
| Labeled -dNTP (1 mM)        | 0.5ul        |
| 10x Nick translation buffer | 2.5ul        |
| DNA polymerase I (10 U/µl)  | 8.0ul        |
| DNase (100 mU/µl)           | 0.4ul        |
| <u>H<sub>2</sub>O to</u>    | <u>25 ul</u> |

Mix and incubate at 15°C for 2 hours. After the reaction, the tube can be left at 4°C overnight.

**2. Ethanol precipitation:** Add 20µg autoclaved salmon sperm DNA (10mg/ml) to each 25µl reaction. Add 1/10 volume of 3M sodium acetate or 5M NaCl and 3 volume of 95% or 100% ethanol. Mix. Place the tubes in a -20°C refrigerator for 2 hours to overnight. Spin in a micro-centrifuge at top speed (> 12,000g) for 5-10 min. Remove the supernatant. Wash the DNA pellets with 70% ethanol. Spin for 5 min and remove the ethanol as much as possible. Air dry for 15 min. Dissolve the pellet in 10µl 2x SSC, 1x TE buffer (pH7.0) for each tube. Store at -20°C in dark.

### II. Dissecting salivary gland and preparation of slides

1. Pour a thin layer of saline solution in the dissecting dish. Collect late 3<sup>rd</sup> instar larvae (crawling on the wall of the culture vial) and drop them into the dish.
2. Label the slides. Clean an area of the bench. Put 1-3 cover glasses (22x22mm) on the clean area. Pipet a drop of saline solution (20µl) to the center of each piece of glass.
3. Use two pairs of forceps. Use one to grab the mouth hook (black) and the other one to hold at the position around one third of the body from the bottom. Pull the first pair of forceps and usually the salivary glands and some other parts will be released. Separate the other parts and separate the fat body. Eliminate the fat as much as possible, but a small amount attached to the glands is acceptable.
4. Use the forceps to pick up the pair of glands and drop them in the drop of saline solution on cover glass. Remove the saline solution. Carefully make sure the salivary

- glands stay on the glass. Add 20 $\mu$ l of fixing solution. Fix (at room temperature) for 5-8 min. Over-fixation will cause difficulty to squash.
5. Move the cover glass close to the edge of the bench (~10mm away from the edge). Hold the labeled end of the slide upside down. Let the slide touch the edge first and align with the cover glass. Slowly lower the slide to touch the fixing solution and immediately flip the slide to pick up the sample with the cover glass.
  6. Place the slide on a clear area of the bench. Cover the slide with two layers of tissue to absorb extra liquid. The cover glass and the sample can be located down the wet area of the covering paper. Use the ultra-fine marker pen (Sharpie) to tap on the cover glass to squash open the cells and spread the chromatin. This type of marker pen has the right weight and even ends (use the bottom end). Start to tap from the edge of the cover slide spiraling into the center and then reverse. Remove the tissue.
  7. Check the slide under the microscope to determine if the chromatin is well distributed. Otherwise more tapping is needed.
  8. (Optional only if the chromatin is not flattened; be careful this step may make the sample unusable.) Use the end of the marker pen to touch the cover glass where the sample is right underneath when the slide is evenly placed on the bench. Slowly press down the marker pen like applying a stamp with gentle pressure. Check the slide and the chromatin should be well flattened. Repeat.
  9. Leave the slide on the surface of dry ice with cover glass and sample facing up for a couple of minutes or longer. The slides can be kept at -80°C for later use.

### III. Hybridization

10. Remove the slide from the frozen condition and hold it in air at room temperature for ~30 seconds. The surface of the cover glass will start to thaw. Immediately use a razor blade to lift off the cover glass.
  11. Place the slide on a flat cardboard and crosslink using optimal UV program.
  12. Turn on the boiling water bath.
  13. Prepare the hybridization buffer for each slide:

|                       |                   |
|-----------------------|-------------------|
| 2xSSC, 1xTE pH7.0     | 15ul              |
| <u>Labeled probes</u> | <u>0.2ul each</u> |
- Mix well.
14. Drop 15ul of hybridization buffer right on the top of the sample of each slide. Cover it with a plastic cover slip.
  15. Place the slides in a humid tray and then cover the slides with the plastic tray upside down. Put the tray into the boiling water bath and cover it with aluminum foil. Incubate for 5 min to denature the chromatin DNA and the probes.
  16. Move the slides to a humid plastic container and seal well. Leave it at 55°C overnight for hybridization.
  17. Move the slides to a Coplin jar and pour in pre-warmed 55°C 2xSSC to cover the sample. Incubate the jar at 55°C for 20min. Discard the liquid. Repeat.
  18. Remove the slides and shake them gently to remove most of the solution. Place the slides in paper tissue. Add a drop of mounting medium and carefully cover it with a

24x50mm cover glass (avoiding bubbles). The slides are ready for microscopy and can be kept in dark at room temperature for weeks.
